1 **Title:** Community structure of phototrophic co-cultures from extreme environments  
2 Charles Brooke<sup>1</sup>, Morgan P. Connolly<sup>2</sup>, Javier A. Garcia<sup>3</sup>, Miranda Harmon-Smith<sup>4</sup>,  
3 Nicole Shapiro<sup>4</sup>, Erik Hawley<sup>5</sup>, Michael Barton<sup>4</sup>, Susannah G. Tringe<sup>4</sup>, Tijana Glavina del  
4 Rio<sup>4</sup>, David E. Culley<sup>6</sup>, Richard Castenholz<sup>7</sup> and \*Matthias Hess<sup>1, 4</sup>

5

6 <sup>1</sup>Systems Microbiology & Natural Products Laboratory, University of California, Davis, CA

7 <sup>2</sup>Microbiology Graduate Group, University of California, Davis, CA

8 <sup>3</sup>Biochemistry, Molecular, Cellular, and Developmental Biology Graduate Group, University of  
9 California, Davis, CA

10 <sup>4</sup>DOE Joint Genome Institute, Walnut Creek, CA

11 <sup>5</sup>Bayer, Pittsburg, PA

12 <sup>6</sup>LifeMine, Cambridge, MA

13 <sup>7</sup>University of Oregon, Eugene, OR

14

15

16 **\*Corresponding author:**

17

18

19

20

21

22

23

24

Matthias Hess  
University of California, Davis  
1 Shields Ave  
Davis, CA 95616, USA  
P (530) 530-752-8809  
F (530) 752-0175  
[mhess@ucdavis.edu](mailto:mhess@ucdavis.edu)

25 **ABSTRACT**

26 Cyanobacteria are found in most illuminated environments and are key players in global  
27 carbon and nitrogen cycling. Although significant efforts have been made to advance our  
28 understanding of this important phylum, still little is known about how members of the  
29 cyanobacteria affect and respond to changes in complex biological systems. This lack of  
30 knowledge is in part due to the reliance on our ability to maintain pure cultures when  
31 determining the metabolism and function of a microorganism. To fill this knowledge-gap,  
32 we selected 26 photosynthetic co-cultures from the Culture Collection of Microorganisms  
33 from Extreme Environments (CCMEE) for 16S rRNA gene sequencing. We assessed if  
34 samples readily available from the CCMEE could contribute valuable insights to advance  
35 applied and fundamental science in the areas of global and local carbon and nitrogen  
36 cycling, without growing individual members of these co-cultures axenically. Results from  
37 this work will aid in determining whether culture depositories in general hold the potential  
38 to advance fundamental and applied research. Since maintaining culture depositories is  
39 resource intensive, such an assessment will be of great value in guiding future funding  
40 decisions.

41

42 **INTRODUCTION**

43

44 Cyanobacteria are photosynthetic prokaryotes that are found in the majority of illuminated  
45 habitats and are known to be some of the most morphologically diverse prokaryotes on  
46 our planet <sup>1</sup>. The global cyanobacterial biomass is estimated to total  $\sim 3 \times 10^{14}$  g of carbon  
47 <sup>2</sup> and cyanobacteria may account for 20–30% of Earth's primary photosynthetic  
48 productivity <sup>3</sup>. The efficient photosynthetic machinery of cyanobacteria has inspired

49 growing interest in the utilization of axenic cyanobacteria as well as cyanobacteria  
50 containing co-cultures in microbial fuel cells <sup>4,5</sup>. In addition to having a global effect on the  
51 carbon cycle, cyanobacteria-mediated nitrogen fixation has been estimated to supply 20–  
52 50% of the nitrogen input in some marine environments <sup>6</sup>. A detailed comprehension of  
53 cyanobacteria and their contribution to global carbon and nitrogen cycling is therefore  
54 necessary for a multi-scalar understanding of these globally important nutrient cycles and  
55 ultimately for our ability to build accurate models to predict future climate patterns.

56

57 Besides their ecological relevance, cyanobacteria have potential applications in  
58 biotechnology. The photosynthetic metabolism of cyanobacteria facilitates the assimilation  
59 of carbon dioxide, a cheap and abundant substrate, to synthesize a variety of value-added  
60 compounds with industrial relevance <sup>7</sup>. Numerous strains of cyanobacteria have been  
61 investigated for their potential to produce bioactive compounds, biofertilizer, biofuels, and  
62 bioplastics <sup>8</sup>; and interactions of cyanobacterial strains with other bacteria have been  
63 found to improve desirable cyanobacterial phenotypes <sup>9</sup>. Genes encoding enzymes  
64 capable of catalyzing reactions that result in unique products, such as modified trichamide,  
65 a cyclic peptide suggested to protect the bloom-forming *Trichodesmium erythraeum*  
66 against predation <sup>10</sup>, and prochlorosins, a family of lanthipeptides with diverse functions  
67 that are synthesized by various strains of *Prochlorococcus* and *Synechococcus* <sup>11,12</sup>, have  
68 been identified from cyanobacterial genomes <sup>13,14</sup>. It is very likely that *de novo* genome  
69 assembly from metagenomic data will facilitate the discovery of novel enzymes from  
70 cyanobacteria for which we currently lack the appropriate isolation and cultivation  
71 techniques. Although metagenome-derived genomes hold great potential to enhance our  
72 knowledge about genomic dark matter, ultimately, improved techniques to isolate and  
73 enable axenic culturing of microorganisms that are currently characterized as

74 “unculturable”, as well as new genetic tools to work with non-axenic cultures will be  
75 necessary in order to fully access the biotechnological potential of cyanobacteria.

76

77 Culture collections provide the possibility of preserving microbial isolates over extended  
78 periods of time without introducing significant genetic changes <sup>15</sup> and they facilitate open  
79 access to these isolates and their associated metadata <sup>16</sup>. Hence co-culture repositories  
80 represent a promising starting point for developing and testing techniques to study and  
81 manipulate uncultivated microbes. Although culture collections hold enormous potential  
82 for capturing and preserving microbial biodiversity and for improving cultivation  
83 techniques, there are numerous challenges in maintaining these biological depositories  
84 and the individual samples they contain. A detailed understanding of the make-up of  
85 individual co-cultures is essential to assess their true value and ultimately to develop  
86 strategies that will be suitable to address challenges associated with long-term sample  
87 maintenance. With recent advances in DNA sequencing technologies and the accessibility  
88 of 16S rRNA gene-based microbial community profiling, we are now well positioned to re-  
89 inventory and evaluate existing culture collections. Standardized inventories will facilitate  
90 sample documentation for deposits maintained by individual laboratories and large culture  
91 collections alike, which will be essential for cataloguing, preserving and surveying the  
92 planet’s microbial biodiversity.

93

94 To explore the potential of culture collections, specifically those that maintain samples of  
95 microbial co-cultures, to provide reference genomes from environmentally or industrially  
96 relevant microorganisms, we reexamined the biodiversity of 26 historical phototrophic  
97 samples from the Culture Collection of Microorganisms from Extreme Environments

98 (CCMEE). While some of the samples, and their dominant phototrophs were studied  
99 previously using 16S rRNA profiling and morphological characterization<sup>17-24</sup> the diversity  
100 of the photosynthetic and non-photosynthetic organisms and the overall community  
101 assemblage of these co-cultures have not yet been characterized. To add further value to  
102 this study, we selected samples that originated from diverse extreme environments across  
103 the globe; with properties suggesting each co-culture would yield a unique microbial  
104 consortium. An enhanced understanding of the microbial diversity that is preserved within  
105 environmental co-cultures available through public culture collections will contribute to a  
106 better understanding of global microbial biodiversity.

107

## 108 **Materials and Methods**

109

### 110 *Sample collection & sample description*

111 Co-cultures selected for this study are part of a larger culture collection and were  
112 collected from different locations (Table 1) between 1988 and 2002. Isolates were  
113 collected using sterile techniques, kept in the dark and stored on ice as quickly as  
114 possible. Samples were transported to the laboratory where aliquots were prepared for  
115 cultivation and preservation at -80°C. For this study, co-cultures were selected from the  
116 CCMEE to cover a variety of geographical locations (Figure 1) as well as a range of  
117 different ecosystems (Table 1). Due to the lack of a consistent terminology historically  
118 used to describe the sampling sites, we categorized co-cultures according to the  
119 geographical location (e.g. Antarctica, Bermuda, Denmark, Mexico and Spain) and  
120 based on a general description of the habitat (i.e. creek, crust, freshwater, hot spring,  
121 marine, saline pond, terrestrial, travertine, and tree bark) from where the co-cultures

122 were collected. In addition, we used the growth medium and temperature (i.e. 12°C,  
123 23°C, 40°C, 45°C, 55°C) at which available co-cultures have been maintained  
124 historically in the laboratory to categorize the co-cultures used in this study.

125 FECB1 (CCMEE ID 5011) and FECB3 (CCMEE ID 5034) were collected from saline and  
126 brackish melt ponds in Antarctica respectively and were dominated by phototrophic  
127 cyanobacteria classified as *Oscillatoria* sp<sup>18</sup>. FECB2 (CCMEE ID 5019) was collected  
128 from a small freshwater pond (Pinnacle Pond) in the Ice Pinnacle area near Bratina  
129 Island, Antarctica, and was phylogenetically uncharacterized prior to our efforts. FECB4  
130 (CCMEE ID 5047; AP1) and FECB5 (CCMEE ID 5049; AO21) were isolated from Lake  
131 Arcas, Spain and the dominant photosynthetic organisms within these samples were  
132 classified by 16S rRNA sequence analysis as being related to *Pseudanabaena limnetica*  
133 and *Oscillatoria* cf. *tenuis*, respectively<sup>24</sup>. FECB6 (CCMEE ID 5051), FECB14 (CCMEE  
134 ID 5093; WT-97 Cal), FECB15 (CCMEE ID 5083), and FECB19 (CCMEE ID 5091; Y-97)  
135 were collected from diverse hot springs and a warm hot spring outflow (warm creek)  
136 within Yellowstone National Park (YNP) (Table 1). FECB10 (CCMEE ID 5056; M88-VD  
137 (1)) was collected as epiliths from the Viscaïno Desert in Mexico<sup>23</sup>. FECB17 (CCMEE ID  
138 5085; RC-97 Cal) and FECB36 (CCMEE ID 6076) were isolated from Rabbit Creek and  
139 a crust in the Sentinel Spring Meadows in YNP respectively and dominant phototrophs  
140 of these co-cultures were characterized previously as *Calothrix* spp.<sup>22</sup>. FECB22  
141 (CCMEE ID 5097; HW-91) and FECB26 (CCMEE ID 5099; B77-scy,j,) were collected  
142 from a tree trunk in Hawaii and a wooded fence in Bermuda respectively. FECB24  
143 (CCMEE ID 5098; AN-90) was obtained from a shallow melt pond (~10 m<sup>2</sup>) in the  
144 Victoria Valley, Antarctica, whereas FECB28 (CCMEE ID 5102) was collected from a  
145 saline melt pond on Bratina Island, Antarctica<sup>19</sup>. FECB32 (CCMEE ID 6031), FECB34  
146 (CCMEE ID 6069) and FECB38 (CCMEE ID 6083) were endoliths collected from

147 subsurface (1-5 mm depths) travertine deposits in YNP <sup>20</sup>. FECB53 (CCMEE ID 5610)  
148 was collected from Sylvan Springs in YNP. Temperature and pH at the sampling site of  
149 FECB53 were determined to be 40°C and pH4. The dominant phototropic strain in  
150 FECB53 was identified previously as the thermo-acidophilic *Cyanidioschyzon* <sup>21</sup>.  
151 FECB58 (CCMEE ID 5216; OH-9-45C) and FECB68 (CCMEE ID 5240; OH-2-55C) were  
152 collected from Hunter's Hot Spring in Oregon and the phototroph dominating these  
153 samples was determined to be a thermophilic member belonging to the genus  
154 *Synechococcus* <sup>17</sup>.

155

#### 156 *Growth of co-cultures*

157 To obtain sufficient biomass for subsequent DNA analysis, 100 µL of each co-culture  
158 were transferred to 25 mL of sterile BG11 media <sup>25</sup>. For FECB52 and FECB53 BG11  
159 was substituted by Cyanidium medium <sup>26</sup>. Co-cultures were subjected to a 12 hr diurnal  
160 light/dark cycle while grown at the temperatures indicated in Table 1.

161

#### 162 *DNA extraction and 16S rRNA gene amplification*

163 Total microbial DNA was extracted from 500 µL of each photosynthetic co-culture using  
164 the FastDNA SPIN Kit for Soil (MP Biomedical, Solon, OH) according to the  
165 manufacturer's instructions. Extracted DNA was quantified via fluorescence (Qubit;  
166 Thermo Scientific, USA) and the hypervariable V4 region of the 16S rRNA gene was  
167 amplified from extracted DNA using the primer set 515F/805R (515F: 5'-  
168 GTGCCAGCMGCCGCGGTAA-3' and 805R: 5'-GGACTACHVGGGTWTCTAAT-3'). The  
169 forward primer included an 11 bp barcode to allow multiplexing of samples during  
170 sequencing. The barcode sequence for each sample is listed in Supplemental Table S1.

171 Subsequent PCR reactions were performed using the 5PRIME HotMasterMix  
172 amplification mix (QIAGEN, Beverly, MA) with the following PCR conditions: initial  
173 denaturation for 90 sec at 94°C, followed by 30 amplification cycles (45 sec at 94°C, 60  
174 sec at 60°C, and 90 sec at 72°C) followed by a final extension step of 72°C for 10 min.  
175 Amplification products were cooled to 4°C. Samples were sequenced at the Department  
176 of Energy's Joint Genome Institute (JGI; <http://www.jgi.doe.gov>) according to JGI's  
177 standard operating procedure using Illumina's MiSeq platform and v3 chemistry.

178

#### 179 *Sequence data analysis*

180 Raw sequencing data were downloaded from the JGI's Genome Portal  
181 (<http://genome.jgi.doe.gov/>) under the project ID 1032475. Data were decompressed  
182 and de-interleaved using the 7-zip software ([www.7-zip.org](http://www.7-zip.org)) and an in-house script,  
183 respectively. De-interleaved files were subsequently processed using MOTHUR version  
184 1.38.1<sup>27,28</sup>. Paired-end reads were combined using the *make.contigs* command.  
185 Sequences with ambiguous base calls and sequences longer than 325 bp were removed  
186 using *screen.seqs*. Duplicate sequences were merged using *unique.seqs*, and the  
187 resulting unique sequences were aligned to the V4 region of the SILVA database (v123)  
188<sup>29</sup>. Chimeras were removed using UCHIME<sup>30</sup> and quality filtered sequences were  
189 taxonomically classified at 80% confidence to the GreenGenes reference taxonomy  
190 (release gg\_13\_5\_99)<sup>31</sup>. Non-prokaryotic sequences were removed and the *dist.seqs*  
191 command was used to calculate pairwise distances between the aligned sequences.  
192 The resulting pairwise distance matrix was used to cluster sequences into operational  
193 taxonomic units (OTUs) with a 97% sequence identity cut-off using UCLUST<sup>32</sup>. The  
194 most abundant sequence of each OTU was picked as the representative sequence.  
195 OTUs were taxonomically classified using the *classify.otu* command using the



196 GreenGenes reference taxonomy (release gg\_13\_5\_99). Shannon, Simpson, and  
197 Chao1 estimators were calculated in MOTHUR <sup>27</sup>.

198

199 In order to visualize the overall compositional differences between the co-cultures, an  
200 uncorrected pairwise distance matrix was generated using the *dist.seqs* command in  
201 MOTHUR and a tree was generated using *Clearcut* (version 1.0.9) <sup>33</sup>. A cladogram from  
202 the resulting tree file was constructed and visualized using iTOL (<https://itol.embl.de>;  
203 accessed on October 16<sup>th</sup>, 2016; <sup>34</sup>). Cluster designations were assigned at a branch  
204 length of 0.05. Samples whose branches split at a distance >0.05 were considered as  
205 part of the same cluster (Figure 2).

206

#### 207 **Availability of data and material**

208 Co-cultures subject to this study are publicly available through the CCME and the  
209 UTEX Culture Collection of Algae at the University of Texas at Austin upon request  
210 using the corresponding FECB ID (Table 1). Co-cultures can also be obtained from the  
211 Hess Lab at UC Davis. Sequences generated during this project have been deposited  
212 and are publicly available at NCBI's SRA under the BioProject ID PRJNA401502. All  
213 other data is included in this published article and its supplementary information files.

214

#### 215 **Results & Discussion**

216

217 A total of 3,357,905 raw reads (mean (SD) = 129,150 ( $\pm$ 15,845) reads per sample) were  
218 generated from the V4 region of the 16S rRNA gene (Table 2). Quality filtering removed  
219 ~3.8% ( $\pm$ 0.57%) of the raw reads from each sample due to insufficient quality. The

220 remaining reads were assigned to a total of 5,785 distinct Operational Taxonomic Units  
221 (OTUs) based on 97% sequence identity (Table S2).

222

223 To estimate the microbial diversity within each sample, rarefaction analyses were  
224 performed (Supplemental Figure S1) and diversity indices were calculated (Table 2). The  
225 inverse Simpson index of the samples ranged between 1.52 and 9.24 with the lowest and  
226 highest indices calculated for FECB3 and FECB32 respectively (Table 2). Not surprisingly,  
227 the diversity in the co-cultures under investigation appeared to be negatively correlated  
228 with the proportion of reads recruited by the dominant OTU of each sample (Pearson  $r = -$   
229 0.8806;  $p < 0.01$ ). Although samples ranked slightly differently based on their diversity  
230 when Chao1 or Shannon indices were calculated, the overall trend remained the same  
231 (Table 2).

232

233

234 *The McMurdo Dry Valley Lake System, a physically highly stable lacustrine system*

235 The McMurdo Dry Valley (MDV) is one of the most extreme deserts on Earth, and although  
236 the importance of the microbial communities for the biogeochemical cycles of this region  
237 is widely accepted, the microbial ecology of the MDV remains poorly understood <sup>35</sup>.  
238 FECB3, originating from a brackish pond on Bratina Island, was dominated by  
239 OTU000003, which recruited 80.3% of all reads (Supplemental Table S2). OTU000003  
240 was classified as the cyanobacterium *Phormidium pseudopriestleyi*, previously reported  
241 to dominate microbial mats of the anoxic zone of Lake Fryxell, Antarctica <sup>36</sup>. The second  
242 and third most abundant OTUs in FECB3 were OTU000015 and OTU000061 respectively  
243 (Supplemental Table S2). Both OTU000015 and OTU000061 were classified as

244 Rhodobacteriaceae and recruited 9.2% and 8.2% of the reads generated for FECB3.  
245 Whereas a taxonomic classification of OTU000015 was not possible at a resolution higher  
246 than the family level, OTU000061 was classified as *Paracoccus marcusii*, a Gram negative  
247 organism that displays a bright orange color due to the synthesis of carotenoids such as  
248 astaxanthin <sup>37</sup>.

249

250 While the microbial ecology of melt ponds and lakes in the MDV, habitats covered year-  
251 round with an ice sheet, have been studied in great detail; most of the insights regarding  
252 the microbial community assemblage in these waters are based primarily on microscopy  
253 <sup>36</sup>. Molecular data, like those presented here and those that could theoretically be  
254 generated from other MDV samples that are readily available from the CCME and other  
255 culture collections, will be of great value to extend our knowledge framework of the  
256 microbial ecology of this unique ecosystem-

257

258 *Omnipresence of Cyanobacteria and Proteobacteria within photosynthetic co-cultures*

259 While the microbial communities of the co-cultures under investigation varied greatly,  
260 cyanobacteria and proteobacteria co-occurred in all 26 of the community assemblages.  
261 Community composition analysis revealed that each of the co-cultures contained at least  
262 one OTU (mean (SD) = 2 ( $\pm$ 1.23)) that recruited >0.1% of the co-culture specific reads  
263 and that was classified as *Cyanobacteria* (Table 3). The only other phylum present in  
264 each of the individual 26 co-cultures and represented by at least one OTU recruiting  
265 >0.1% of the reads was the *Proteobacteria* phylum (Table 3). In contrast, only three  
266 samples, namely FECB5, FECB30 and FECB68, contained OTUs that recruited >0.1%  
267 of the sample specific reads and that could not be classified at the phylum level or at a  
268 higher taxonomic resolution (Table 3). It is possible that the relatively high abundance of

269 non-classified phyla might contribute to the separation of these samples into distinct  
270 clusters (i.e. cluster XII, IX, and IV) (Figure 2). In addition to their omnipresence,  
271 *Cyanobacteria* and *Proteobacteria* also recruited the majority of the reads in all but four  
272 (i.e. FECB2, FECB12, FECB58, and FECB68) of the samples under investigation  
273 (Figure 3 and Supplemental Table S3). In FECB2 and FECB12 the majority of the reads  
274 were recruited by OTUs classified as members of the phylum *Bacteroidetes* (recruiting  
275 50.6% and 72% of the reads respectively), whereas within FECB58 and FECB68,  
276 *Armatimonadetes* (38.3%) and *Chloroflexi* (25.9%) were identified as the most abundant  
277 phyla (Figure 3 and Supplemental Table S3). The fact that these samples were  
278 dominated by phyla other than the *Cyanobacteria* or *Proteobacteria* may also help to  
279 explain why these samples (Figure 2) form distinct clusters (cluster I, XIV and V, IV  
280 respectively).

281

282

283 *Firmicutes* dominate photosynthetic co-cultures from hot springs

284 *Firmicutes* abundances calculated for co-cultures from hot spring samples were higher  
285 compared to those calculated for co-cultures from other environments studied during this  
286 project. OTUs assigned to the *Firmicutes* phylum were detected above the applied cut-  
287 off level of 0.1% in only four of the twenty-six co-cultures under investigation (Table 3).  
288 Interestingly, these samples (i.e. FECB34, FECB52, FECB58 and FECB68) are co-  
289 cultures collected from hot springs or deposits within hot springs, with FECB52, FECB58  
290 and FECB68 being maintained in culture at temperatures >40°C. OTU000073 (classified  
291 as *Alicyclobacillus tolerans*), OTU000082 (classified as members of the genus  
292 *Paenibacillus*), OTU000154 (classified as *Geobacillus vulcani*), and OTU000158  
293 (classified as a member of the *Bacillaceae* family) recruited 5.9%, 3.4% , 0.5% and 0.4%

294 of the reads generated from FECB52, FECB34, FECB68 and FECB58 respectively  
295 (Supplemental Table S2). *Alicyclobacillus tolerans* and *Geobacillus vulcani* have been  
296 described previously as aerobic spore-forming thermophiles and have been isolated  
297 from lead–zinc ores <sup>38</sup> and hot springs <sup>39</sup> in Russia, respectively. Members of the genus  
298 *Paenibacillus* have been isolated from a wide variety of environments and some  
299 *Paenibacillus* species have been found to promote crop growth directly via biological  
300 nitrogen fixation, phosphate solubilization, production of the phytohormone indole-3-  
301 acetic acid and they have been identified as a potential source of novel antimicrobial  
302 agents <sup>40</sup>. Although it is difficult to make a reliable prediction of the metabolic capacities  
303 of the organism associated with OTU000082 solely based on 16S rRNA data, it is  
304 certainly possible that this organism might possess the ability to promote or inhibit plant  
305 and microbial growth respectively.

306

307 *Photosynthetic co-cultures from Antarctica and YNP to study adaptation to increased*  
308 *radiation, low temperatures and oligotrophic growth conditions*

309 Microbial adaptation to extreme environments and the molecular framework that allows  
310 microorganisms to survive and thrive in the presence of increased rates of radiation, low  
311 temperatures and in the absence of nutrients has fascinated the scientific community for  
312 decades and remains poorly understood. In an attempt to provide a better basis of the  
313 taxonomic make-up of co-cultures that were collected from ecosystems that are  
314 characterized by these extremes we included co-cultures from Antarctica and YNP in  
315 this study (Table 1). OTU-based comparison of Antarctica and YNP co-cultures revealed  
316 between 197 (FECB2) and 549 (FECB6) distinct OTUs (mean (SD) = 342 ( $\pm$ 87.2)  
317 OTUs), based on 97% sequence similarity (Table 2). The number of OTUs that recruited  
318 >0.1% of all reads ranged from 3 to 29 OTUs, with FECB2 and FECB32 having the

319 lowest and highest OTU count respectively (Table 2). FECB2 was dominated by an OTU  
320 classified as *Hymenobacter*, which recruited all *Bacteroidetes*-specific reads generated  
321 from this sample (Tables 3 & 4). The genus *Hymenobacter* contains several pigmented  
322 bacteria that have been isolated from Antarctica and have been reported to possess  
323 increased resistance to radiation <sup>41,42</sup>, which might explain their increased abundance in  
324 FECB2, a co-culture isolated from an environment known to possess increased levels of  
325 UV radiation. Taking this into consideration, FECB2 and its individual community  
326 members could be a potential target for future studies to enhance our understanding of  
327 processes that confer resistance to radiation and DNA damage. The second most  
328 abundant OTU in FECB2, recruiting 48% of the generated samples, was classified as  
329 *Phormidium* sp (Supplemental Table S2), a cyanobacterial genus that has been reported  
330 to dominate aquatic microbial mats from Antarctica <sup>43,44</sup>. Representative isolates from  
331 this genus have been proposed previously as cost-effective options for industrial  
332 carotenoid production <sup>45</sup>, suggesting that FECB2 may hold the potential for industrial  
333 carotenoid production.

334

335 FECB32 is a mixed culture isolated from an ancient travertine at Mammoth in YNP. Our  
336 analysis indicated that FECB32 contained 29 OTUs that each accounted for >0.1% of all  
337 the generated reads (Table 2). Fifteen of these OTUs recruited >1% of all reads and 4  
338 OTUs collectively accounted for ~60% of the reads generated from this co-culture  
339 (Supplemental Table S4). These 4 OTUs were classified as *Sphingopyxis alaskensis*,  
340 *Chelativorans* sp. and as members of the *Chitinophagaceae* and *Comamonadaceae*  
341 *families*, recruiting ~19%, 13%, 17%, and 11% of the reads respectively (Supplemental  
342 Tables S2 & S4). *Sphingopyxis alaskensis* is a Gram negative bacterium found in  
343 relatively high abundance in oligotrophic regions of the ocean <sup>46,47</sup> and it has been

344 studied in great detail as a model marine bacterium, specifically to understand microbial  
345 adaptation to cold or oligotrophic environments<sup>48,49</sup>. The *Chitinophagaceae* family  
346 contains a wide phylogenetic diversity with many of its members being mesophilic.  
347 However, *Chitinophagaceae* have been reported to grow optimally at temperatures of  
348 55°C and higher<sup>50,51</sup>.

349

350 *Photosynthetic co-cultures containing the deep-branching candidate phylum*

351 *Melainabacteria*

352 Extreme environments, similar to those on early Earth, are often proposed to hold critical  
353 information about the historical progression of life on our planet and one niche that  
354 encompasses those physical stresses is the endolithic environment of rocks<sup>20</sup>.

355 Phylogenetic analysis of the heterotrophic population associated with FECB32, which  
356 was isolated from travertine deposited by hot springs in YNP, found that sequences from  
357 MLE-12 (OTU000109) recruited ~2% of the sample specific sequences (Supplemental  
358 Table S2). This rendered MLE-12, previously assigned to the deep-branching candidate  
359 phylum *Melainabacteria*<sup>52</sup>, as the eleventh most abundant organism in this  
360 photosynthetic co-culture. It has been proposed previously that *Melainabacteria*, which is  
361 commonly found in aquatic habitats, separated from the cyanobacteria before the latter  
362 acquired photosynthetic capabilities<sup>52</sup>. Hence FECB32 might be a particularly valuable  
363 co-culture to generate new insights into the evolution of and relationship between the  
364 phylogenetically closely related *Cyanobacteria* and *Melainabacteria*. In addition, this  
365 sample might provide the opportunity to enhance our understanding of the origin of  
366 oxygenic photosynthesis and aerobic respiration in *Cyanobacteria*, an area that is  
367 currently still poorly understood<sup>53</sup>.

368

369 Interestingly, OTU000109 was also detected in FECB36 and FECB38 (Supplemental  
370 Table S2), although at significantly lower abundance (<0.001%). FECB36 and FECB38  
371 were similar to FECB32 in that they were isolated from sites in YNP. Interestingly,  
372 FECB32 and FECB38 cluster together (cluster IX) suggesting a similar overall microbial  
373 community profiles, but separately from FECB36 (Figure 2). The only additional samples  
374 that contained OTUs classified as *Melainabacteria*, recruiting >0.1% of the generated  
375 reads, were FECB58 and FECB68 with ~0.9% and ~0.2% of their reads to this deeply  
376 branched phylum, respectively (Supplemental Table S2). It seems noteworthy that  
377 FECB58 and FECB68 were also isolated from hot springs and clustered closely together  
378 based on their overall microbiome composition (Clusters V and IV respectively; Figure  
379 2).

380

### 381 *Photosynthetic co-cultures from Hunter's Hot Spring, Oregon*

382 Hunters Hot Spring continues to be a source of interesting microbial activity. FECB58  
383 and FECB68 were both isolated from Hunters Hot Spring in Oregon, USA and they  
384 shared similar microbial community members. Despite their similar community profile,  
385 abundances of the dominant OTUs associated with these two hot spring co-cultures  
386 were remarkably different. FECB58 was dominated by 3 OTUs (OTU000014,  
387 OTU000024, and OTU000033). OTU000014 was classified as OS-L, an uncultured  
388 representative of the phylum *Armatimonadetes*, OTU000024 which was classified as  
389 belonging to the *Bacteroidetes* phylum, and OTU000033 which was classified as  
390 *Thermosynechococcus*. These OTUs contributed 38%, 29% and 20% of the reads  
391 generated from FECB58 respectively. Whereas OTU000014 recruited ~4.9% of all reads



392 generated from FECB68, representing the sixth most abundant OTU in the FECB68  
393 community, OTU000024 and OTU000033 were only present at an abundance <0.0001%  
394 in FECB68 (Supplemental Table S2).

395

396 FECB68 was dominated by 6 OTUs (i.e. OTU000028, OTU000030, OTU000036,  
397 OTU000049, OTU000065, and OTU000014) recruiting ~25.7%, 23.1%, 20.4%, 14.3%,  
398 7.6%, and 4.9% of the reads respectively. OTU000028 was classified as belonging to  
399 the genus *Chloroflexus*, whereas OTU000030 and OTU000036 were classified as  
400 representative of the genus *Meiothermus* and *Gloeobacter*, respectively. *Chloroflexus* is  
401 an anoxygenic phototrophic bacterium that grows at temperatures up to 70°C<sup>54</sup> and  
402 forms yellow-orange-greenish mats in association with cyanobacteria<sup>55</sup>. Members of the  
403 cyanobacterial genus *Gloeobacter* lack thylakoids, and have been proposed to host the  
404 earliest ancestors, or a missing link, in the cyanobacteria lineage<sup>56</sup>. Thus, FECB68  
405 offers a unique opportunity to investigate interspecies interaction between a member of  
406 these basal cyanobacteria and the thermophilic phototroph *Chloroflexus*, represented by  
407 OTU000028 in this co-culture. As outlined in a recent review<sup>54</sup>, Hunter's Hot Spring  
408 located in Oregon is one of the most studied hot springs in the world, and has a large  
409 repertoire of work conducted over the last 40 years<sup>54</sup>. However, most of this work was  
410 performed prior to the advent of recent molecular techniques. Hence, the sequencing  
411 data generated from FECB58 and FECB68 during this study will complement previous  
412 work performed using traditional microbiology techniques and facilitate new insights into  
413 the microbiology of this unique ecosystem.

414

415 *Photosynthetic co-cultures from lignocellulosic surfaces with potential to fix nitrogen and*  
416 *degrade aromatic compounds.*

417 FECB22 and FECB26 are mesophilic co-cultures collected from similar habitats (i.e.  
418 from tree bark and a wooden fence) from two locations (i.e. Hawaii and Bermuda)  
419 approximately 9,000 kilometers apart from each other (Figure 1 & Table 1). Diversity  
420 index calculation placed these two samples in the mid-range of the diversity spectrum of  
421 the 26 co-cultures analyzed for this study. The inverse Simpson, Chao1, and Shannon  
422 index was calculated at 4.46, 937.11 and 2.08 for FECB22 and 2.29, 722.94, and 1.32  
423 for FECB26, respectively (Table 2). Within FECB22, 23 OTUs were identified as  
424 individually recruiting more than 0.1% of the generated reads. In contrast, FECB26  
425 contained only 16 OTUs that recruited more than 0.1% of the reads each (Table S2).  
426 FECB22, scraped from tree bark in Hawaii, was dominated by 11 OTUs, each recruiting  
427 >1% of the reads. The most abundant OTU (OTU000017) was classified as a member of  
428 the *Mycoplana*, a genus that contains bacteria capable of aromatic compound  
429 degradation<sup>57</sup>, and it recruited 40.2% of the reads. OTU000042 (classified as *Rhizobium*  
430 *leguminosarum*), OTU000045 (classified as *Acetobacteraceae*), and OTU000072  
431 (classified as *Cyanobacteria*), were the next most abundant OTUs, recruiting 17.1%,  
432 16.3%, and 5.5% of the reads generated from FECB22 respectively. *Rhizobium*  
433 *leguminosarum* is a well-studied  $\alpha$ -proteobacterium capable of N<sub>2</sub>-fixation and “rhizobia”  
434 have been suggested repeatedly to facilitate more sustainable agricultural practices  
435 through their symbiosis with legumes, reducing the need for nitrogen fertilizer<sup>58</sup>. It  
436 remains to be seen if OTU000042 provides N<sub>2</sub> to the other organisms in this co-culture  
437 or if it consumes all of the fixed N<sub>2</sub> itself. *Acetobacteraceae* are  $\alpha$ -proteobacteria often  
438 associated with low pH environments and are known for their ability to efficiently  
439 synthesize biological cellulose<sup>59,60</sup>. Furthermore, *Acetobacteraceae* have been reported

440 before as some of the dominant players in photosynthetic consortia during soil formation  
441 <sup>61</sup>. It would be interesting to explore the agricultural and chemical potential of a  
442 minimalistic co-culture composed of the 4 OTUs (i.e. OTU000017, OTU000042,  
443 OTU000045 and OTU000072) that dominated FECB22, as they may combine the ability  
444 to degrade aromatic compounds and synthesize cellulose while removing nitrogen from  
445 the atmosphere. FECB26, on the other hand, was dominated by OTU000010, which  
446 recruited 63.2% of the reads generated and classified as an unclassified member of the  
447 *Nostocales*; a phylogenetic group known for their functional and morphological diversity.  
448 Members of the *Sphingomonadaceae* (i.e. OTU000041 and OTU000062), phototropic  $\alpha$ -  
449 proteobacteria often found in high abundance in environments previously thought to  
450 support mostly the growth of cyanobacteria <sup>62</sup>, contributed to a total of 25.6% of the  
451 generated reads. Most interestingly, OTU000017 was also identified within FECB26  
452 recruiting ~1.6% of the reads. It is possible that OTU000017 facilitates a metabolic  
453 reaction, in which aromatic compounds typically associated with the decomposition of  
454 woody material under aerobic conditions are utilized. Further characterization of this  
455 organism in co-culture and eventually in axenic culture might provide further clarity if this  
456 is the case.

457

## 458 **Conclusion**

459

460 Culture collections can provide easy access to biological samples without the need for  
461 extensive resources by the requesting individual, subsequently facilitating new studies  
462 and ultimately advancing our understanding and appreciation of phylogenetic and  
463 functional biodiversity. The 16S rRNA based community fingerprints of the 26

464 photosynthetic co-cultures described here provide us with a first glimpse into the  
465 taxonomic and functional diversity of communities from extreme environments that were  
466 considered for a long time as too harsh to support the growth of complex microbial  
467 communities. The extreme conditions that are associated with the habitats from where  
468 these co-cultures were collected offer the unique opportunity to study the molecular  
469 mechanisms that support the growth of these extremophilic co-cultures and their role in  
470 global carbon and nitrogen cycling. Furthermore, an in-depth understanding of these  
471 extreme co-cultures holds the potential to discover novel microbial proteins that might  
472 render current agricultural, industrial and medical processes more economical and  
473 sustainable. The relatively low diversity and complexity of these co-cultures make them  
474 ideal subjects to investigate symbiotic relationships. By determining the chemical and  
475 physical requirements of individual community members in the low complexity co-cultures  
476 described here, the goal of enabling their axenic growth is promising. Advancing our ability  
477 to infer the metabolic requirements of individual hitherto uncultivable microorganisms is of  
478 great importance as has been shown by a large body of work including the “Genomic  
479 Encyclopedia of Bacteria and Archaea” (GEBA) and CyanoGEBA projects, multi-  
480 investigator projects spearheaded by the Kerfeld and Eisen group in collaboration with  
481 Drs. Krypides and Woyke from the DOE’s Joint Genome Institute <sup>63-65</sup>. However,  
482 bioinformatics and wet-lab tools to dissect complex microbial communities and processes  
483 into their individual components are still in their infancy and obtaining pure isolates from  
484 complex microbial communities still represents a major challenge. The photosynthetic co-  
485 cultures utilized in this work represent excellent model systems for tool development and  
486 verification due to their relatively low community complexity and their public availability via  
487 culture collections such as the CCME and UTEX.

488

489 This study highlights a major challenge (i.e. standardization of protocols) associated with  
490 environmental samples and sample data obtained during independent sampling efforts.  
491 Fortunately, with recent advances in data technologies, the task of data acquisition and  
492 dissemination has become less of a challenge. Recording standardized geographical and  
493 environmental data, such as latitude, longitude, elevation, and temperature, can now be  
494 performed with relatively high accuracy on a range of electronic devices - from most cell  
495 phones, to inexpensive handheld devices developed specifically for accurate data  
496 acquisition under field conditions. In order to make the best use of these technologies and  
497 of biological samples that will be collected, defining a set of minimal information  
498 parameters to be recorded during the collection of an environmental sample is of great  
499 importance. Similar efforts have been successfully implemented by the Genomic  
500 Standards Consortium (GSC) for microbial genomes and metagenomes in the form of the  
501 “minimum information about a genome sequence” (MIGS) <sup>66</sup> and are enforced when  
502 describing a novel microbial species <sup>67</sup>. It is understandable that characteristics suitable  
503 as “minimal information” for environmental samples might differ from those that have been  
504 established for axenic isolates and their genomes. However, as long as there is  
505 consistency, the reported data will provide a valuable starting point for future efforts to  
506 retroactively study archived samples.

507

508 16S rRNA gene profiling has become a commodity and easily generated phylogenetic  
509 fingerprints provide a useful starting point to classify and categorize environmental  
510 samples of microbial co-cultures. Due to the wide availability and continuing decline in  
511 cost, this technique provides an ideal approach to re-examine the phylogenetic makeup  
512 of legacy samples before they disappear due to continuous decline in funding for  
513 maintaining small and non-centralized culture collections. In combination with biochemical

514 measurements, such as carbon and nitrogen utilization capabilities, the scientific  
515 community would have immediate access to the phylogenetic and functional diversity  
516 available through the existing culture collections. The identification of **Minimum**  
517 **Information about a Co-Culture Sample (MICCS)** would be a significant step in  
518 standardizing sample acquisition and maintenance, increasing the value of current and  
519 future microbial samples collected from the environment. Developing MICCS and applying  
520 them to co-cultures currently available from existing culture depositories is beyond the  
521 scope of the work presented here, but we hope that the results presented here will  
522 contribute to the initiation of this process and stimulate broad involvement and support  
523 from the scientific community and various funding agencies.

524

525 Another noteworthy aspect of samples readily available through existing culture  
526 collections, including the consortia discussed in this work, is their educational value. More  
527 specifically, samples that can be acquired and maintained without the need of significant  
528 resources and for which basic phylogenetic and functional information is available. These  
529 co-cultures provide a unique opportunity for exciting undergraduate research, in  
530 combining microbial diversity, microbial ecology and biotechnology. Techniques for basic  
531 biochemical and physiological characterizations of these samples could be learned and  
532 conducted by dedicated undergraduate students within a few weeks. A research program  
533 based on these co-cultures would provide students with the unique opportunity to develop  
534 laboratory skills and to learn firsthand about biogeochemical processes that shape our  
535 environment and climate. Additional publicly available *omics* data, such as metagenomics  
536 and metatranscriptomics generated from individual samples, would extend the scope of  
537 these undergraduate research programs, in providing students the opportunity to learn

538 various *omics* analysis techniques using web-based tools or standalone scripts,  
539 depending on the educational level and interest of each student.

540

541 In summary, culture collections that provide access to and standardized information  
542 about microorganisms and microbial consortia provide opportunities for educational and  
543 scientific progress. Therefore, it is of high importance that culture collections continue to  
544 obtain the financial support necessary to provide this invaluable service to our society

545

## 546 **References**

- 547 1     Whitton, B. A. & Potts, M. *The ecology of cyanobacteria: their diversity in time*  
548     *and space.*, 3-4 (Kluwer Academic, 2000).
- 549 2     Garcia-Pichel, F., Belnap, J., Neuer, S. & Schanz, F. Estimates of global  
550     cyanobacterial biomass and its distribution. *Algological Studies* **109**, 213-227,  
551     doi:10.1127/1864-1318/2003/0109-0213 (2003).
- 552 3     Pisciotta, J. M., Zou, Y. & Baskakov, I. V. Light-dependent electrogenic activity of  
553     cyanobacteria. *PLoS One* **5**, e10821, doi:10.1371/journal.pone.0010821 (2010).
- 554 4     Gajda, I., Greenman, J., Melhuish, C. & Ieropoulos, I. Self-sustainable electricity  
555     production from algae grown in a microbial fuel cell system. *Biomass &*  
556     *Bioenergy* **82**, 87-93, doi:10.1016/j.biombioe.2015.05.017 (2015).
- 557 5     Zhao, J., Li, X. F., Ren, Y. P., Wang, X. H. & Jian, C. Electricity generation from  
558     Taihu Lake cyanobacteria by sediment microbial fuel cells. *Journal of Chemical*  
559     *Technology and Biotechnology* **87**, 1567-1573, doi:10.1002/jctb.3794 (2012).
- 560 6     Karl, D. *et al.* The role of nitrogen fixation in biogeochemical cycling in the  
561     subtropical North Pacific Ocean. *Nature* **388**, 533-538 (1997).
- 562 7     Al-Haj, L., Lui, Y. T., Abed, R. M., Gomaa, M. A. & Purton, S. Cyanobacteria as  
563     Chassis for Industrial Biotechnology: Progress and Prospects. *Life (Basel)* **6**,  
564     doi:10.3390/life6040042 (2016).
- 565 8     Abed, R. M., Dobretsov, S. & Sudesh, K. Applications of cyanobacteria in  
566     biotechnology. *J Appl Microbiol* **106**, 1-12, doi:10.1111/j.1365-2672.2008.03918.x  
567     (2009).

- 568 9 Wang, R. *et al.* Construction and characteristics of artificial consortia of  
569 *Scenedesmus obliquus*-bacteria for *S. obliquus* growth and lipid production. *Algal*  
570 *Research* **12**, 436-445, doi:<http://doi.org/10.1016/j.algal.2015.10.002> (2015).
- 571 10 Sudek, S., Haygood, M. G., Youssef, D. T. & Schmidt, E. W. Structure of  
572 trichamide, a cyclic peptide from the bloom-forming cyanobacterium  
573 *Trichodesmium erythraeum*, predicted from the genome sequence. *Appl Environ*  
574 *Microbiol* **72**, 4382-4387, doi:10.1128/AEM.00380-06 (2006).
- 575 11 Li, B. *et al.* Catalytic promiscuity in the biosynthesis of cyclic peptide secondary  
576 metabolites in planktonic marine cyanobacteria. *Proc Natl Acad Sci U S A* **107**,  
577 10430-10435, doi:10.1073/pnas.0913677107 (2010).
- 578 12 Cubillos-Ruiz, A., Berta-Thompson, J. W., Becker, J. W., van der Donk, W. A. &  
579 Chisholm, S. W. Evolutionary radiation of lanthipeptides in marine cyanobacteria.  
580 *Proceedings of the National Academy of Sciences* **114**, E5424-E5433,  
581 doi:10.1073/pnas.1700990114 (2017).
- 582 13 Kleigrewe, K., Gerwick, L., Sherman, D. H. & Gerwick, W. H. Unique marine  
583 derived cyanobacterial biosynthetic genes for chemical diversity. *Nat Prod Rep*  
584 **33**, 348-364, doi:10.1039/c5np00097a (2016).
- 585 14 Zarzycki, J., Axen, S. D., Kinney, J. N. & Kerfeld, C. A. Cyanobacterial-based  
586 approaches to improving photosynthesis in plants. *J Exp Bot* **64**, 787-798,  
587 doi:10.1093/jxb/ers294 (2013).
- 588 15 McCluskey, K. A Review of Living Collections with Special Emphasis on  
589 Sustainability and Its Impact on Research Across Multiple Disciplines. *Biopreserv*  
590 *Biobank* **15**, 20-30, doi:10.1089/bio.2016.0066 (2017).
- 591 16 Boundy-Mills, K. *et al.* The United States Culture Collection Network (USCCN):  
592 Enhancing Microbial Genomics Research through Living Microbe Culture  
593 Collections. *Appl Environ Microbiol* **81**, 5671-5674, doi:10.1128/AEM.01176-15  
594 (2015).
- 595 17 Miller, S. R. & Castenholz, R. W. Evolution of thermotolerance in hot spring  
596 cyanobacteria of the genus *Synechococcus*. *Appl Environ Microbiol* **66**, 4222-  
597 4229 (2000).
- 598 18 Nadeau, T.-L., Milbrandt, E. C. & Castenholz, R. W. EVOLUTIONARY  
599 RELATIONSHIPS OF CULTIVATED ANTARCTIC OSCILLATORIAN  
600 (CYANOBACTERIA). *Journal of Phycology* **37**, 650-654, doi:10.1046/j.1529-  
601 8817.2001.037004650.x (2001).
- 602 19 Nadeau, T.-L. & Castenholz, R. W. CHARACTERIZATION OF PSYCHROPHILIC  
603 OSCILLATORIAN (CYANOBACTERIA) FROM ANTARCTIC MELTWATER  
604 PONDS. *Journal of Phycology* **36**, 914-923, doi:10.1046/j.1529-  
605 8817.2000.99201.x (2000).



- 606 20 Norris, T. B. & Castenholz, R. W. Endolithic photosynthetic communities within  
607 ancient and recent travertine deposits in Yellowstone National Park. *FEMS*  
608 *Microbiol Ecol* **57**, 470-483, doi:10.1111/j.1574-6941.2006.00134.x (2006).
- 609 21 Toplin, J. A., Norris, T. B., Lehr, C. R., McDermott, T. R. & Castenholz, R. W.  
610 Biogeographic and phylogenetic diversity of thermoacidophilic cyanidiales in  
611 Yellowstone National Park, Japan, and New Zealand. *Appl Environ Microbiol* **74**,  
612 2822-2833, doi:10.1128/AEM.02741-07 (2008).
- 613 22 Dillon, J. G. & Castenholz, R. W. The synthesis of the UV-screening pigment,  
614 scytonemin, and photosynthetic performance in isolates from closely related  
615 natural populations of cyanobacteria (*Calothrix* sp.). *Environmental Microbiology*  
616 **5**, 484-491, doi:10.1046/j.1462-2920.2003.00436.x (2003).
- 617 23 Dillon, J. G., Tatsumi, C. M., Tandingan, P. G. & Castenholz, R. W. Effect of  
618 environmental factors on the synthesis of scytonemin, a UV-screening pigment,  
619 in a cyanobacterium (*Chroococcidiopsis* sp.). *Arch Microbiol* **177**, 322-331,  
620 doi:10.1007/s00203-001-0395-x (2002).
- 621 24 Camacho, A., Garcia-Pichel, F., Vicente, E. & Castenholz, R. W. Adaptation to  
622 sulfide and to the underwater light field in three cyanobacterial isolates from Lake  
623 Arcas (Spain). *FEMS Microbiology Ecology* **21**, 293-301, doi:10.1111/j.1574-  
624 6941.1996.tb00126.x (1996).
- 625 25 Allen, M. M. & Stanier, R. Y. Selective Isolation of Blue-green Algae from Water  
626 and Soil. *Microbiology* **51**, 203-209, doi:doi:10.1099/00221287-51-2-203 (1968).
- 627 26 Castenholz, R. W. in *The Prokaryotes: A Handbook on Habitats, Isolation, and*  
628 *Identification of Bacteria* (eds Mortimer P. Starr *et al.*) 236-246 (Springer Berlin  
629 Heidelberg, 1981).
- 630 27 Schloss, P. D. *et al.* Introducing mothur: open-source, platform-independent,  
631 community-supported software for describing and comparing microbial  
632 communities. *Applied and environmental microbiology* **75**, 7537-7541,  
633 doi:10.1128/AEM.01541-09 (2009).
- 634 28 Kozich, J. J., Westcott, S. L., Baxter, N. T., Highlander, S. K. & Schloss, P. D.  
635 Development of a dual-index sequencing strategy and curation pipeline for  
636 analyzing amplicon sequence data on the MiSeq Illumina sequencing platform.  
637 *Appl Environ Microbiol* **79**, 5112-5120, doi:10.1128/AEM.01043-13 (2013).
- 638 29 Quast, C. *et al.* The SILVA ribosomal RNA gene database project: improved data  
639 processing and web-based tools. *Nucleic Acids Res* **41**, D590-596,  
640 doi:10.1093/nar/gks1219 (2013).
- 641 30 Edgar, R. C., Haas, B. J., Clemente, J. C., Quince, C. & Knight, R. UCHIME  
642 improves sensitivity and speed of chimera detection. *Bioinformatics* **27**, 2194-  
643 2200, doi:10.1093/bioinformatics/btr381 (2011).

- 644 31 McDonald, D. *et al.* An improved Greengenes taxonomy with explicit ranks for  
645 ecological and evolutionary analyses of bacteria and archaea. *ISME J* **6**, 610-  
646 618, doi:10.1038/ismej.2011.139 (2012).
- 647 32 Edgar, R. C. Search and clustering orders of magnitude faster than BLAST.  
648 *Bioinformatics* **26**, 2460-2461, doi:10.1093/bioinformatics/btq461 (2010).
- 649 33 Evans, J., Sheneman, L. & Foster, J. Relaxed neighbor joining: a fast distance-  
650 based phylogenetic tree construction method. *J Mol Evol* **62**, 785-792,  
651 doi:10.1007/s00239-005-0176-2 (2006).
- 652 34 Letunic, I. & Bork, P. Interactive tree of life (iTOL) v3: an online tool for the  
653 display and annotation of phylogenetic and other trees. *Nucleic Acids Res* **44**,  
654 W242-245, doi:10.1093/nar/gkw290 (2016).
- 655 35 Chan, Y., Van Nostrand, J. D., Zhou, J., Pointing, S. B. & Farrell, R. L. Functional  
656 ecology of an Antarctic Dry Valley. *Proc Natl Acad Sci U S A* **110**, 8990-8995,  
657 doi:10.1073/pnas.1300643110 (2013).
- 658 36 Jungblut, A. D. *et al.* Microbial Mat Communities along an Oxygen Gradient in a  
659 Perennially Ice-Covered Antarctic Lake. *Appl Environ Microbiol* **82**, 620-630,  
660 doi:10.1128/AEM.02699-15 (2015).
- 661 37 Harker, M., Hirschberg, J. & Oren, A. *Paracoccus marcusii* sp. nov., an orange  
662 gram-negative coccus. *Int J Syst Bacteriol* **48 Pt 2**, 543-548,  
663 doi:10.1099/00207713-48-2-543 (1998).
- 664 38 Karavaiko, G. I. *et al.* Reclassification of 'Sulfobacillus thermosulfidooxidans  
665 subsp. thermotolerans' strain K1 as Alicyclobacillus tolerans sp. nov. and  
666 Sulfobacillus disulfidooxidans Dufresne *et al.* 1996 as Alicyclobacillus  
667 disulfidooxidans comb. nov., and emended description of the genus  
668 Alicyclobacillus. *Int J Syst Evol Microbiol* **55**, 941-947, doi:10.1099/ijms.0.63300-0  
669 (2005).
- 670 39 Nazina, T. N. *et al.* *Geobacillus gargensis* sp. nov., a novel thermophile from a  
671 hot spring, and the reclassification of *Bacillus vulcani* as *Geobacillus vulcani*  
672 comb. nov. *Int J Syst Evol Microbiol* **54**, 2019-2024, doi:10.1099/ijms.0.02932-0  
673 (2004).
- 674 40 Grady, E. N., MacDonald, J., Liu, L., Richman, A. & Yuan, Z. C. Current  
675 knowledge and perspectives of *Paenibacillus*: a review. *Microb Cell Fact* **15**, 203,  
676 doi:10.1186/s12934-016-0603-7 (2016).
- 677 41 Marizcurrena, J. J. *et al.* Searching for novel photolyases in UVC-resistant  
678 Antarctic bacteria. *Extremophiles* **21**, 409-418, doi:10.1007/s00792-016-0914-y  
679 (2017).
- 680 42 Oh, T. J., Han, S. R., Ahn, D. H., Park, H. & Kim, A. Y. Complete genome  
681 sequence of *Hymenobacter* sp. strain PAMC26554, an ionizing radiation-  
682 resistant bacterium isolated from an Antarctic lichen. *J Biotechnol* **227**, 19-20,  
683 doi:10.1016/j.jbiotec.2016.04.011 (2016).

- 684 43 Strunecky, O., Elster, J. & Komarek, J. Molecular clock evidence for survival of  
685 Antarctic cyanobacteria (Oscillatoriales, Phormidium autumnale) from Paleozoic  
686 times. *FEMS Microbiol Ecol* **82**, 482-490, doi:10.1111/j.1574-6941.2012.01426.x  
687 (2012).
- 688 44 Jungblut, A.-D. *et al.* Diversity within cyanobacterial mat communities in variable  
689 salinity meltwater ponds of McMurdo Ice Shelf, Antarctica. *Environmental*  
690 *Microbiology* **7**, 519-529, doi:10.1111/j.1462-2920.2005.00717.x (2005).
- 691 45 Shukla, S. P. & Kashyap, A. K. An assessment of biopotential of three  
692 cyanobacterial isolates from Antarctic for carotenoid production. *Indian J*  
693 *Biochem Biophys* **40**, 362-366 (2003).
- 694 46 Vancanneyt, M. *et al.* *Sphingomonas alaskensis* sp. nov., a dominant bacterium  
695 from a marine oligotrophic environment. *Int J Syst Evol Microbiol* **51**, 73-79,  
696 doi:10.1099/00207713-51-1-73 (2001).
- 697 47 Cavicchioli, R., Ostrowski, M., Fegatella, F., Goodchild, A. & Guixa-Boixereu, N.  
698 Life under nutrient limitation in oligotrophic marine environments: an  
699 eco/physiological perspective of *Sphingopyxis alaskensis* (formerly  
700 *Sphingomonas alaskensis*). *Microb Ecol* **45**, 203-217, doi:10.1007/s00248-002-  
701 3008-6 (2003).
- 702 48 Lauro, F. M. *et al.* The genomic basis of trophic strategy in marine bacteria. *Proc*  
703 *Natl Acad Sci U S A* **106**, 15527-15533, doi:10.1073/pnas.0903507106 (2009).
- 704 49 Ting, L. *et al.* Cold adaptation in the marine bacterium, *Sphingopyxis alaskensis*,  
705 assessed using quantitative proteomics. *Environ Microbiol* **12**, 2658-2676,  
706 doi:10.1111/j.1462-2920.2010.02235.x (2010).
- 707 50 Hanada, S., Tamaki, H., Nakamura, K. & Kamagata, Y. *Crenotalea thermophila*  
708 gen. nov., sp. nov., a member of the family Chitinophagaceae isolated from a hot  
709 spring. *Int J Syst Evol Microbiol* **64**, 1359-1364, doi:10.1099/ijs.0.058594-0  
710 (2014).
- 711 51 Anders, H. *et al.* *Thermoflavifilum aggregans* gen. nov., sp. nov., a thermophilic  
712 and slightly halophilic filamentous bacterium from the phylum Bacteroidetes. *Int J*  
713 *Syst Evol Microbiol* **64**, 1264-1270, doi:10.1099/ijs.0.057463-0 (2014).
- 714 52 Di Rienzi, S. C. *et al.* The human gut and groundwater harbor non-photosynthetic  
715 bacteria belonging to a new candidate phylum sibling to Cyanobacteria. *Elife* **2**,  
716 e011102, doi:10.7554/eLife.011102 (2013).
- 717 53 Soo, R. M., Hemp, J., Parks, D. H., Fischer, W. W. & Hugenholtz, P. On the  
718 origins of oxygenic photosynthesis and aerobic respiration in Cyanobacteria.  
719 *Science* **355**, 1436-1440, doi:10.1126/science.aal3794 (2017).
- 720 54 Castenholz, R. W. Portrait of a Geothermal Spring, Hunter's Hot Springs,  
721 Oregon. *Life (Basel)* **5**, 332-347, doi:10.3390/life5010332 (2015).

- 722 55 Hanada, S. in *The Prokaryotes: Other Major Lineages of Bacteria and The*  
723 *Archaea* (eds Eugene Rosenberg *et al.*) 515-532 (Springer Berlin Heidelberg,  
724 2014).
- 725 56 Saw, J. H. *et al.* Cultivation and complete genome sequencing of *Gloeobacter*  
726 *kilaueensis* sp. nov., from a lava cave in Kilauea Caldera, Hawai'i. *PLoS One* **8**,  
727 e76376, doi:10.1371/journal.pone.0076376 (2013).
- 728 57 Urakami, T., Oyanagi, H., Araki, H., Suzuki, K.-I. & Komagata, K.  
729 Recharacterization and Emended Description of the Genus *Mycoplana* and  
730 Description of Two New Species, *Mycoplana ramosa* and *Mycoplana segnis*.  
731 *International Journal of Systematic and Evolutionary Microbiology* **40**, 434-442,  
732 doi:doi:10.1099/00207713-40-4-434 (1990).
- 733 58 Marek-Kozaczuk, M. *et al.* Host-dependent symbiotic efficiency of *Rhizobium*  
734 *leguminosarum* bv. *trifolii* strains isolated from nodules of *Trifolium rubens*.  
735 *Antonie Van Leeuwenhoek*, doi:10.1007/s10482-017-0922-7 (2017).
- 736 59 Semjonovs, P. *et al.* Cellulose synthesis by *Komagataeibacter rhaeticus* strain P  
737 1463 isolated from Kombucha. *Appl Microbiol Biotechnol* **101**, 1003-1012,  
738 doi:10.1007/s00253-016-7761-8 (2017).
- 739 60 Rozenberga, L. *et al.* Characterisation of films and nanopaper obtained from  
740 cellulose synthesised by acetic acid bacteria. *Carbohydr Polym* **144**, 33-40,  
741 doi:10.1016/j.carbpol.2016.02.025 (2016).
- 742 61 Mapelli, F. *et al.* Bacterial communities involved in soil formation and plant  
743 establishment triggered by pyrite bioweathering on arctic moraines. *Microb Ecol*  
744 **61**, 438-447, doi:10.1007/s00248-010-9758-7 (2011).
- 745 62 Tahon, G. & Willems, A. Isolation and characterization of aerobic anoxygenic  
746 phototrophs from exposed soils from the Sor Rondane Mountains, East  
747 Antarctica. *Syst Appl Microbiol* **40**, 357-369, doi:10.1016/j.syapm.2017.05.007  
748 (2017).
- 749 63 Shih, P. M. *et al.* Improving the coverage of the cyanobacterial phylum using  
750 diversity-driven genome sequencing. *Proceedings of the National Academy of*  
751 *Sciences of the United States of America* **110**, 1053-1058,  
752 doi:10.1073/pnas.1217107110 (2013).
- 753 64 Mukherjee, S. *et al.* 1,003 reference genomes of bacterial and archaeal isolates  
754 expand coverage of the tree of life. *Nat Biotechnol* **35**, 676-683,  
755 doi:10.1038/nbt.3886 (2017).
- 756 65 Kyrpides, N. C. *et al.* Genomic encyclopedia of bacteria and archaea:  
757 sequencing a myriad of type strains. *PLoS Biol* **12**, e1001920,  
758 doi:10.1371/journal.pbio.1001920 (2014).
- 759 66 Field, D. *et al.* The minimum information about a genome sequence (MIGS)  
760 specification. *Nat Biotechnol* **26**, 541-547, doi:10.1038/nbt1360 (2008).

761 67 Kampfer, P., Buczolits, S., Albrecht, A., Busse, H. J. & Stackebrandt, E. Towards  
762 a standardized format for the description of a novel species (of an established  
763 genus): *Ochrobactrum gallinifaecis* sp. nov. *Int J Syst Evol Microbiol* **53**, 893-896,  
764 doi:10.1099/ijs.0.02710-0 (2003).

765

766 **Acknowledgements:** This work was funded by the College of Agricultural and  
767 Environmental Science and the Microbiology & Biochemistry, Molecular, Cellular, and  
768 Developmental Biology Graduate Group at University of California Davis (Davis, CA) and  
769 the U.S. Department of Energy (DOE) Joint Genome Institute (JGI) in Walnut Creek, CA.  
770 Work conducted by the JGI, a DOE User Facility, is supported by DOE's Office of  
771 Science under Contract No. DE-AC02-05CH11231. We would also thank Drs. Jorge  
772 Rodrigues and John Meeks from UC Davis for providing valuable comments and  
773 suggestions on how to improve this manuscript.

774 We would like to dedicate this publication to Professor Dr. Richard Castenholz who  
775 passed away during the completion of this work after a long and satisfying journey in the  
776 world of Cyanobacteria. He was, and will remain, a great inspiration to many of us.

777

778 **Conflict of Interest:** The authors declare no conflicts of interest.

779

#### 780 **Author Contributions**

781 Charles Brooke, Richard Castenholz, David E. Culley, Matthias Hess, and Susannah G.  
782 Tringe wrote the manuscript. Richard Castenholz and Matthias Hess designed the  
783 experiment. Erik Hawley and Matthias Hess performed experiment. Michael Barton,  
784 David E. Culley, Tijana Glavina del Rio, Miranda Harmon-Smith, Erik Hawley, Matthias  
785 Hess, Nicole Shapiro, and Susannah G. Tringe generated the data. Michael Barton,  
786 Charles Brooke, Morgan P. Connolly, David E. Culley, Javier A. Garcia, Tijana Glavina

787 del Rio, Miranda Harmon-Smith, Erik Hawley, Matthias Hess, and Nicole Shapiro

788 analyzed the data.

789 **Figures & Tables Legends**

790 **Figure 1: Geographical locations of co-cultures analyzed.** 1.) Antarctica. McMurdo  
791 Ice Shelf; Bratina Island; 2.) Spain. Lake Arcas; 3.) USA. Yellowstone National Park; 4.)  
792 Mexico. Vizcaino Desert; 5.) USA. Eugene, Oregon. 6.) USA. Hawaii; 7.) Bermuda,  
793 Somerset; 8.) Denmark. Limfjord Shallows; 9.) USA. Hunter's Hot Spring, Oregon. (Map  
794 downloaded and adapted from  
795 <https://commons.wikimedia.org/wiki/File:ColoredBlankMap-World-10E.svg#file>)

796

797 **Figure 2: Cladogram of 16S rRNA based community composition of co-cultures**  
798 **under investigation.** FECB ID are provided for each co-culture. Sample location is  
799 indicated on the branch. Roman numerals on the right indicate the clusters identified at a  
800 branch cutoff of 0.05. Symbols (i.e. circles and squares) next to the sample ID indicate  
801 habitat type and their color indicates the temperatures at which samples were historically  
802 maintained in the CCME.

803

804 **Figure 3: Relative abundance of phyla associated with phototrophic co-cultures.**  
805 **16S rRNA based community profile.** Only phyla recruiting >1% of the reads in at least  
806 one of the co-cultures are shown.

807

808 **Table 1: Summary of photosynthetic co-cultures for which 16S rRNA gene profiles**  
809 **were generated.**

810

811 **Table 2: Sequencing statistics and diversity indices for co-cultures investigated in**  
812 **this study.**

813

814 **Table 3: Count and phylogenetic classification of identified OTUs at the phylum**  
815 **level. Only OTUs recruiting >0.1% of the co-culture specific reads are shown.**

816

817 **Table 4: Taxonomy relative abundance of dominant OTU identified in each co-**  
818 **culture.**

819

820

821

822



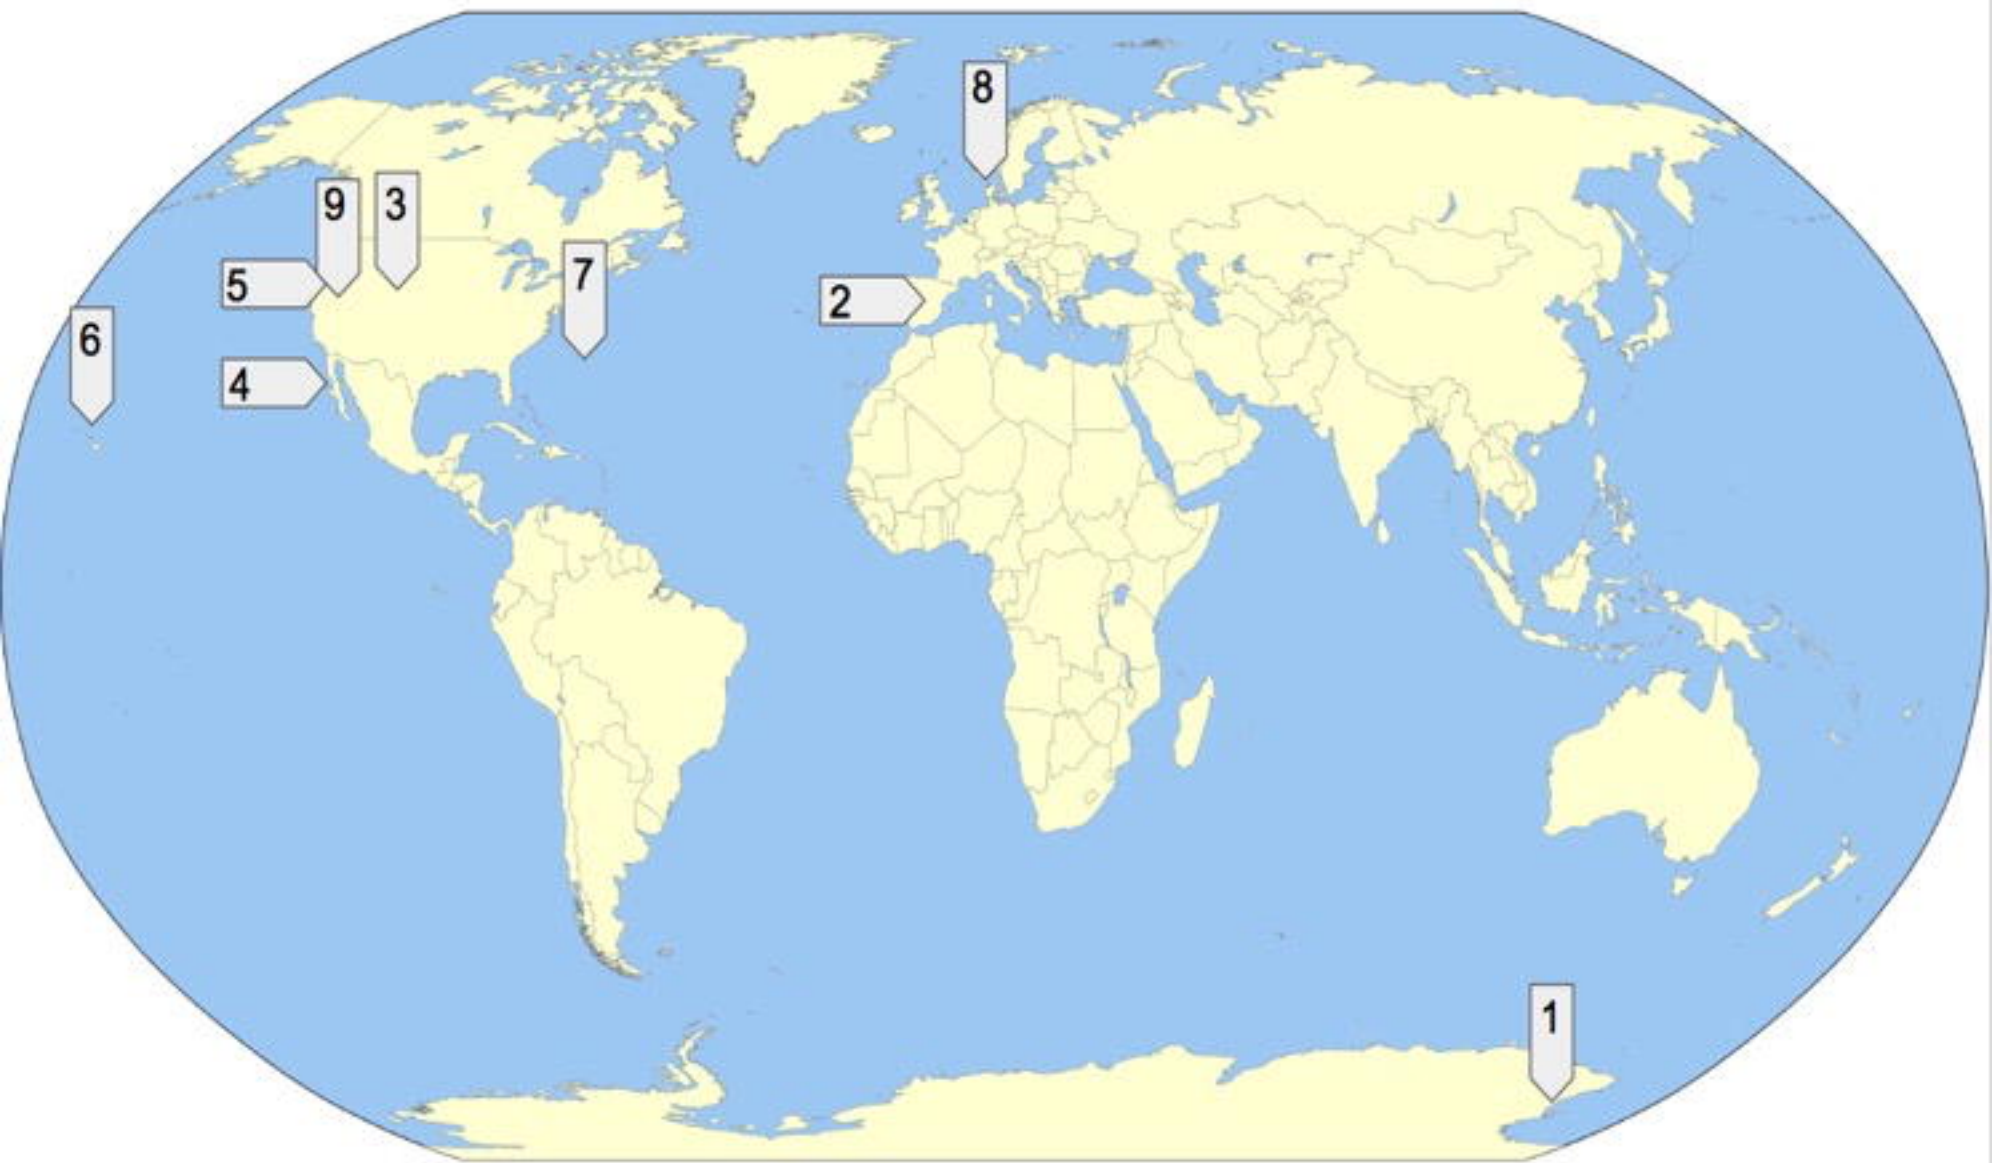

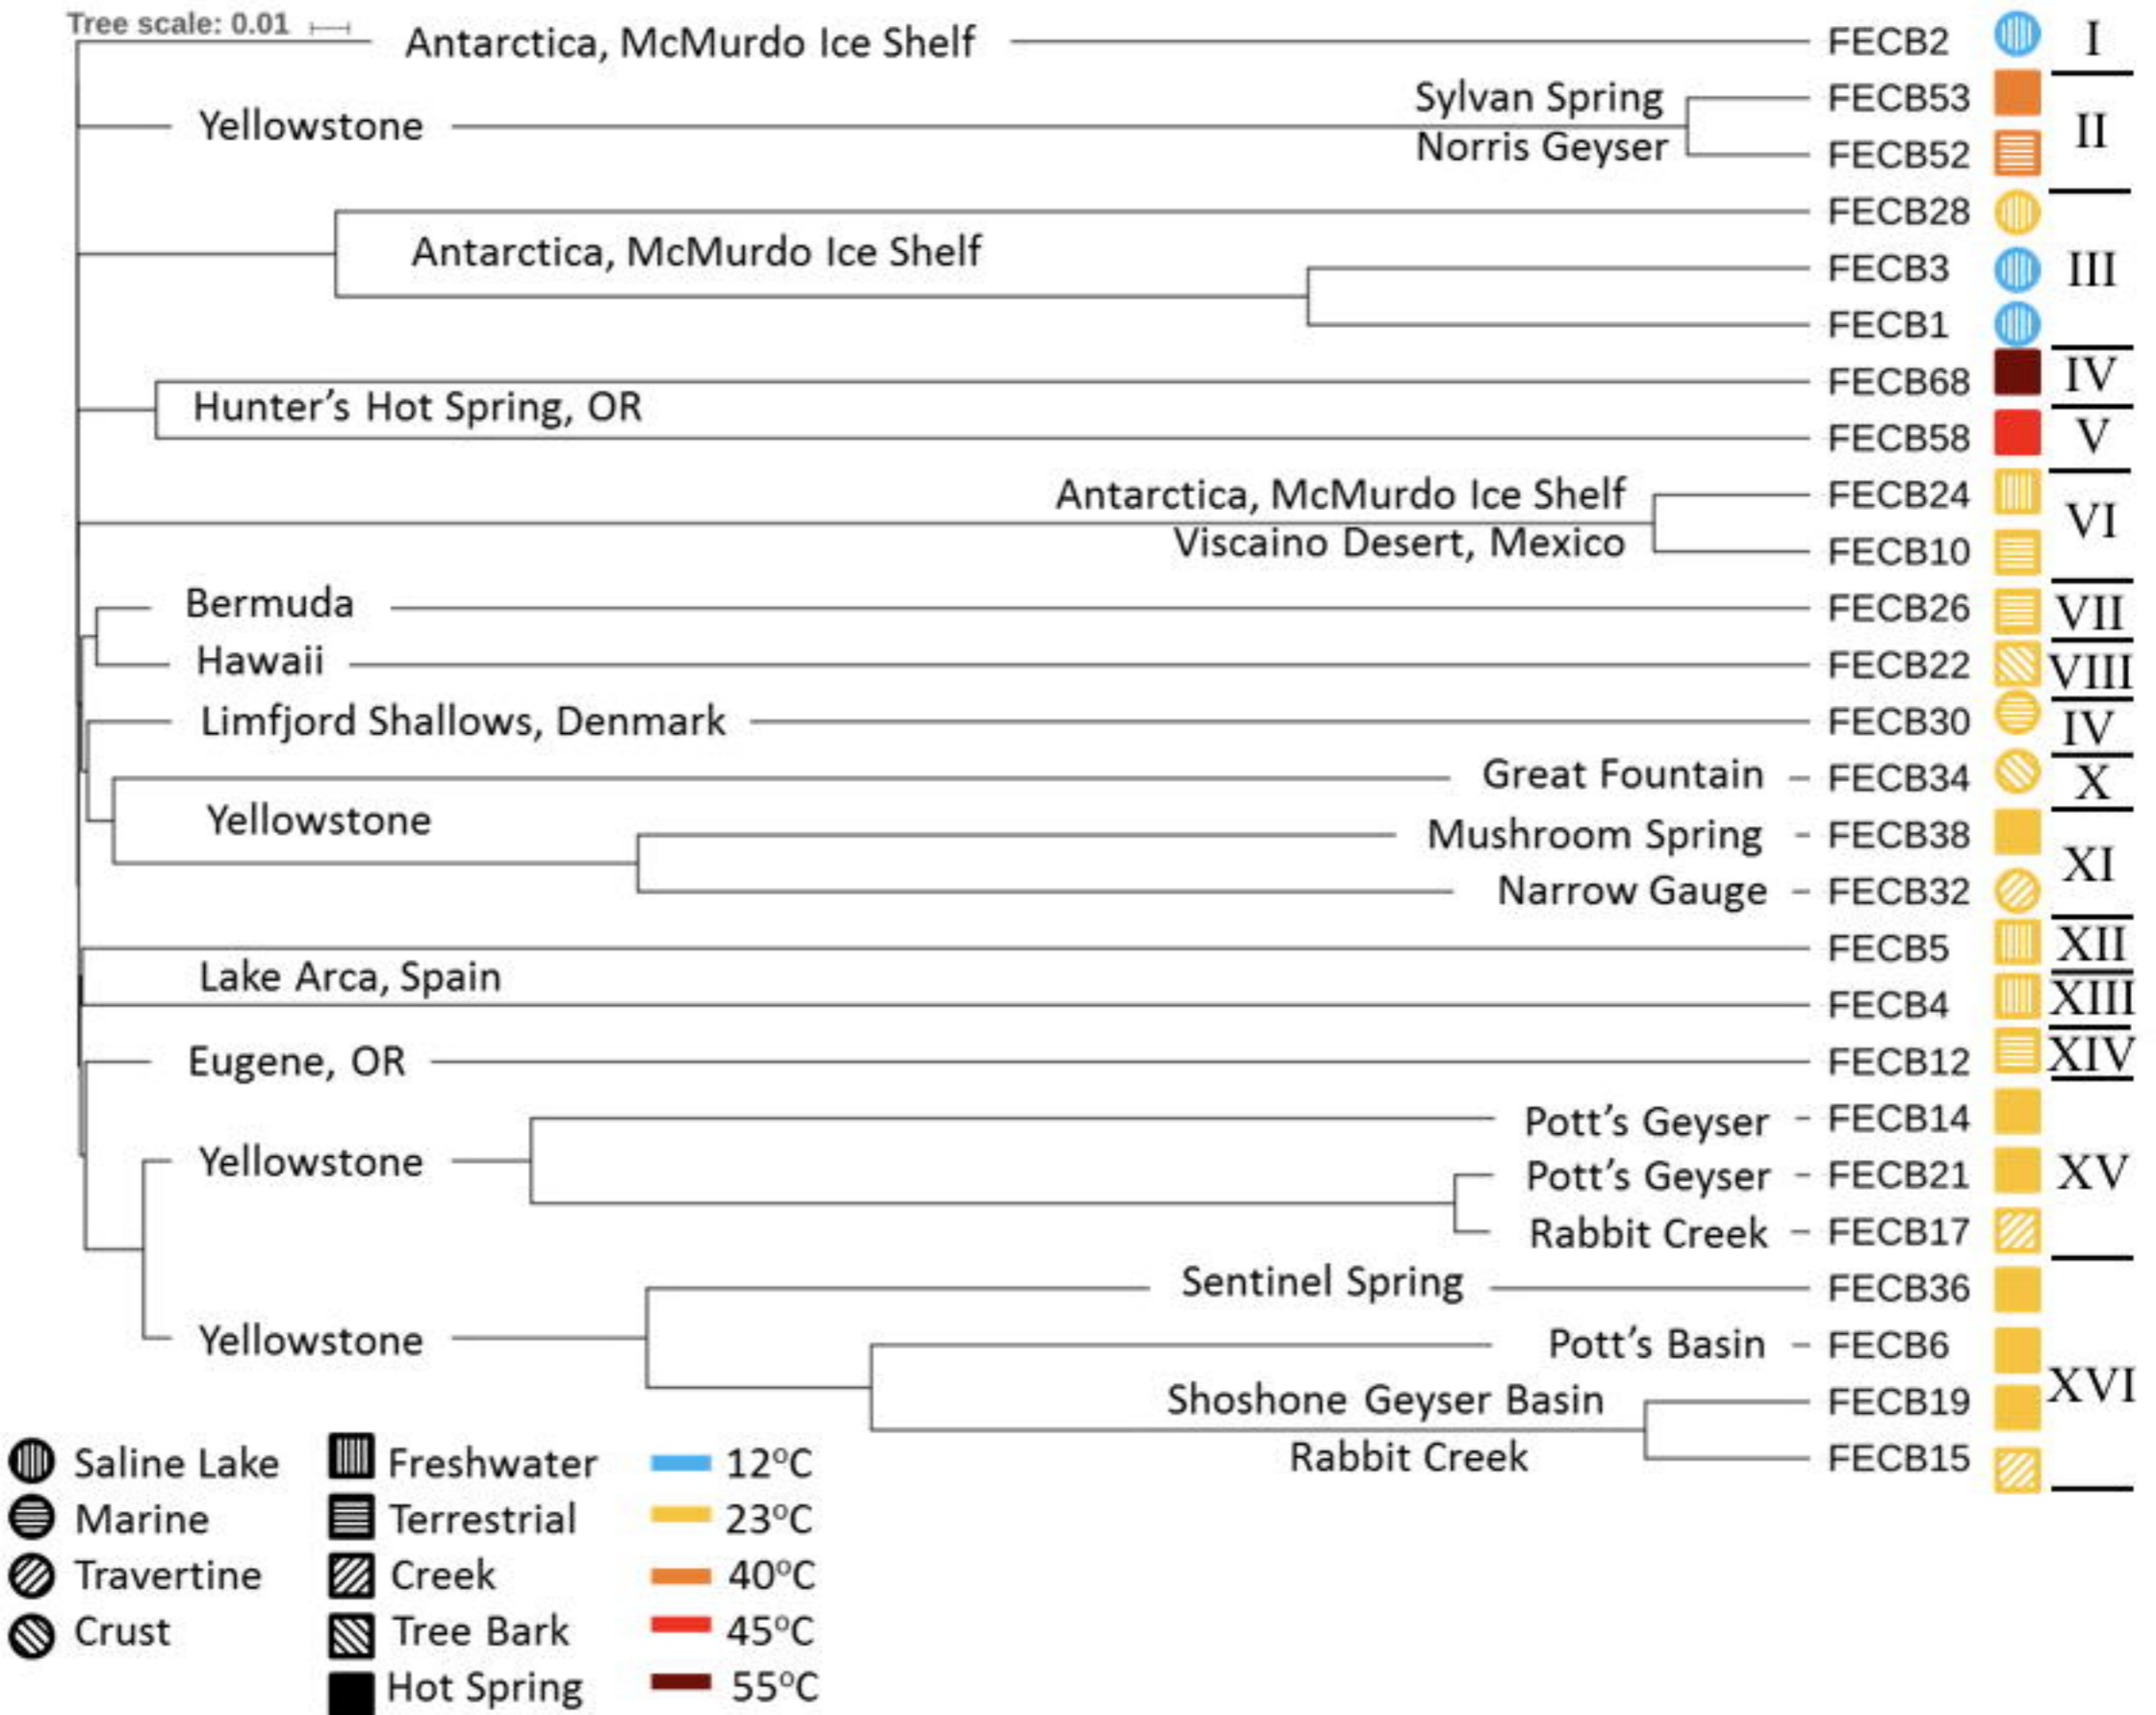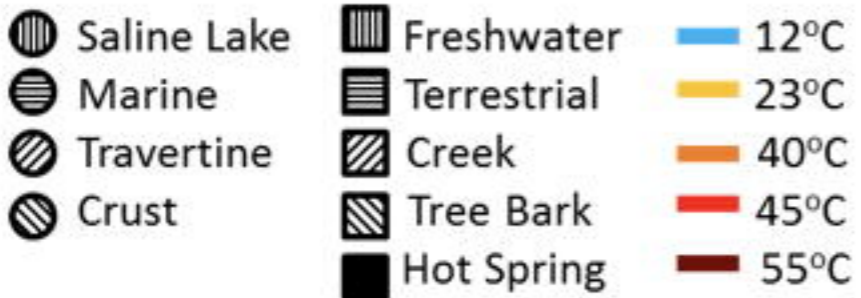

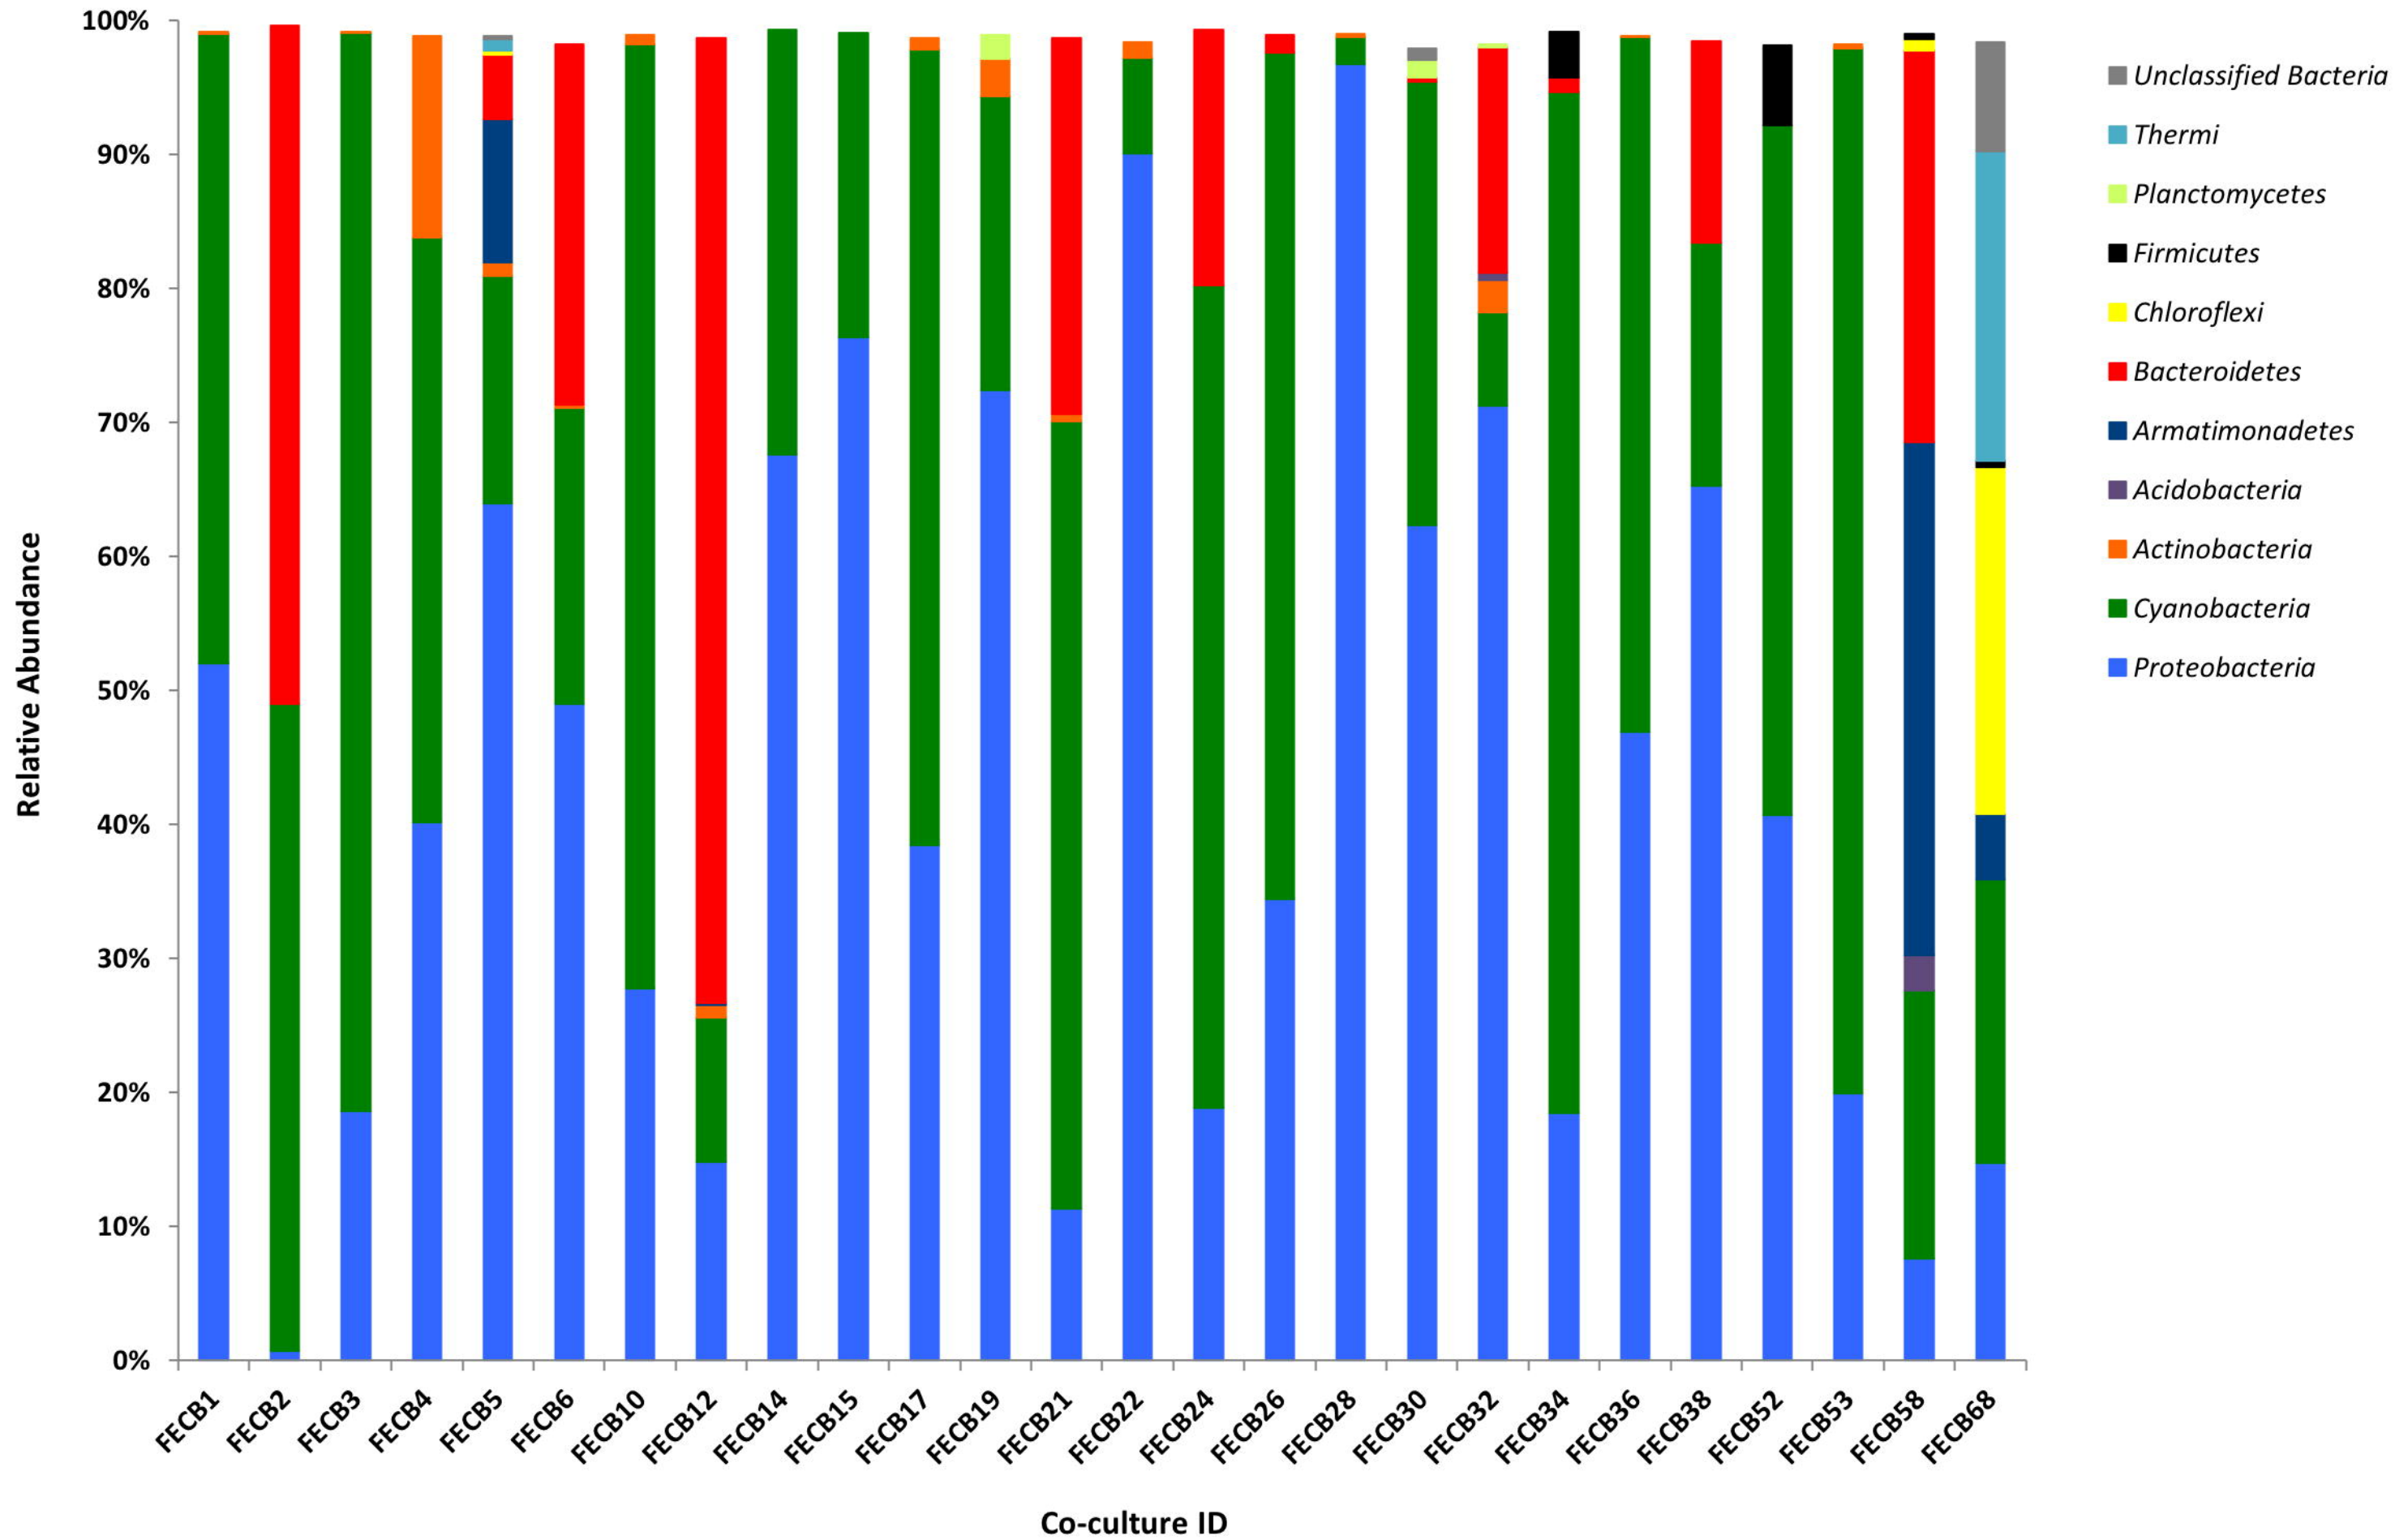

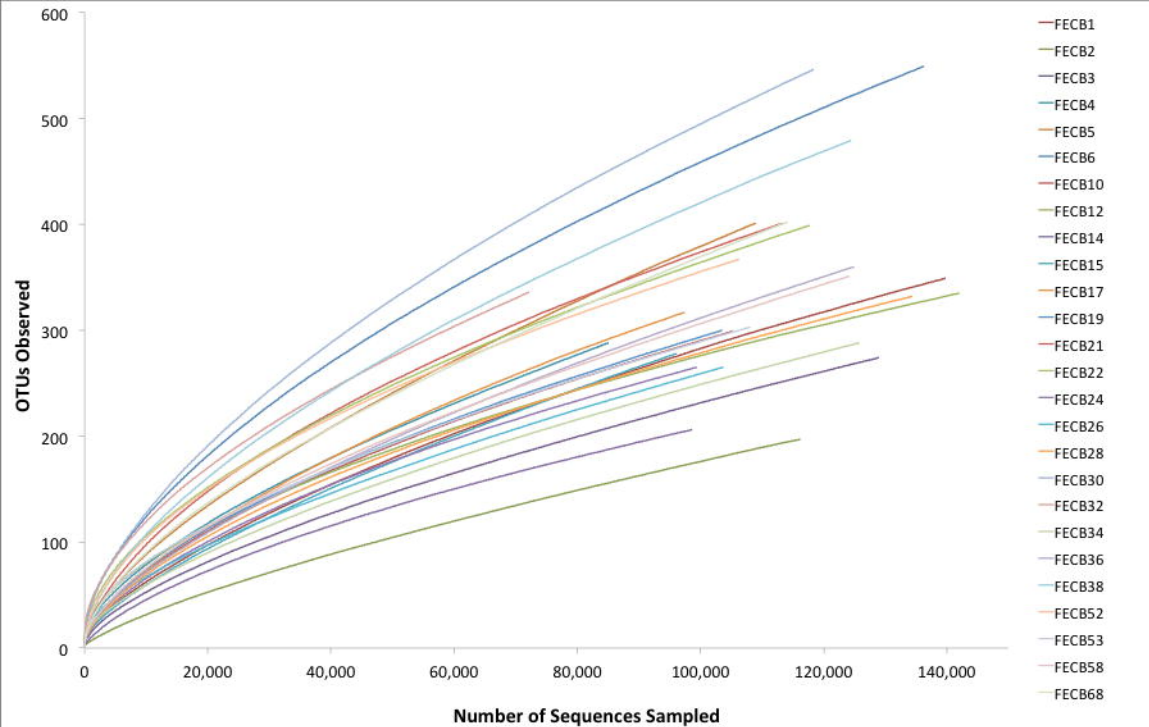

Source: http://biorxiv.org/content/10.1101/427211v1.full.pdf
